# Supplementary material
Source: publisher site journal article supplement (https://www.dovepress.com/article/593404)

# Supplementary Material

Supplementary Figure S1. Confusion matrices of individual machine learning models in the training set. (a) Logit; (b) LightGBM; (c) Random Forest; (d) SVM; (e) XGBoost; (f) ANN


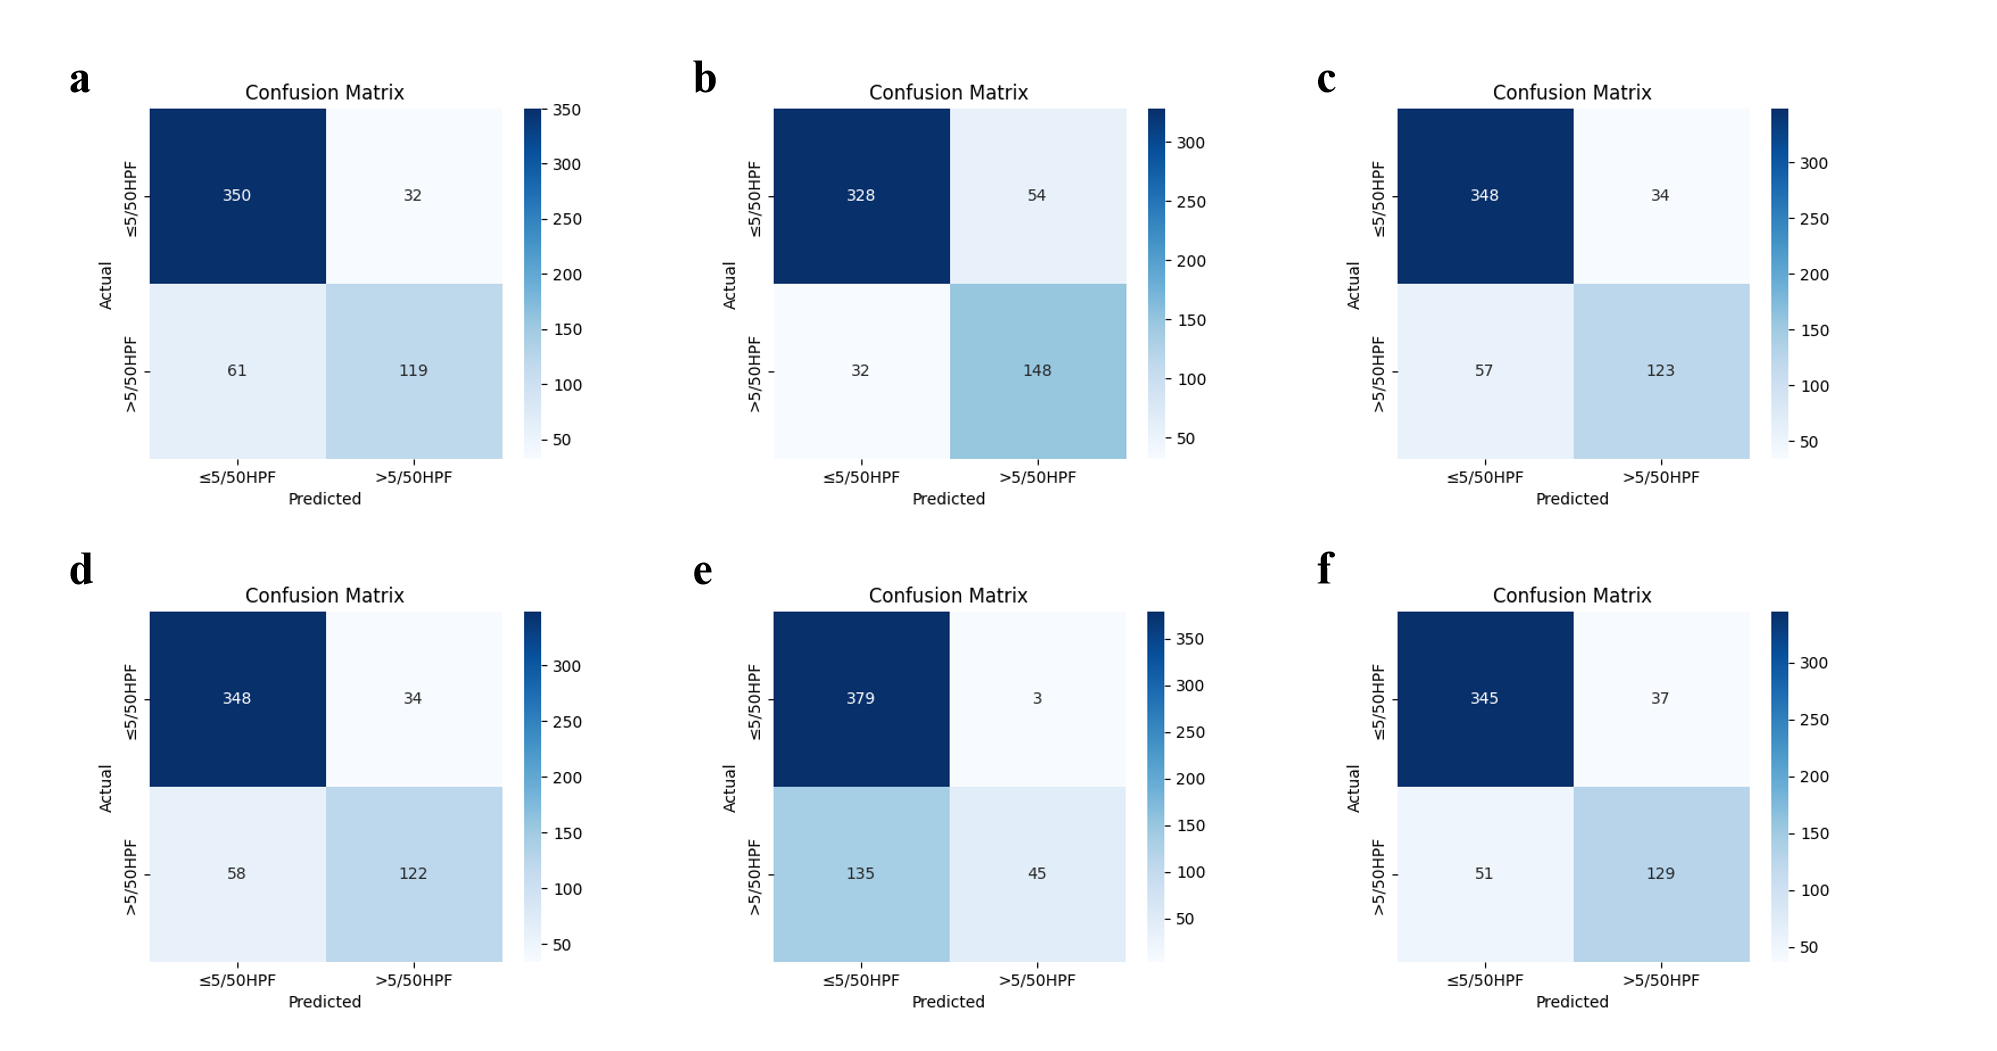


Supplementary Figure S2. ROC curves of each model in the training set. (a) Logit; (b) LightGBM; (c) Random Forest; (d) SVM; (e) XGBoost; (f) ANN


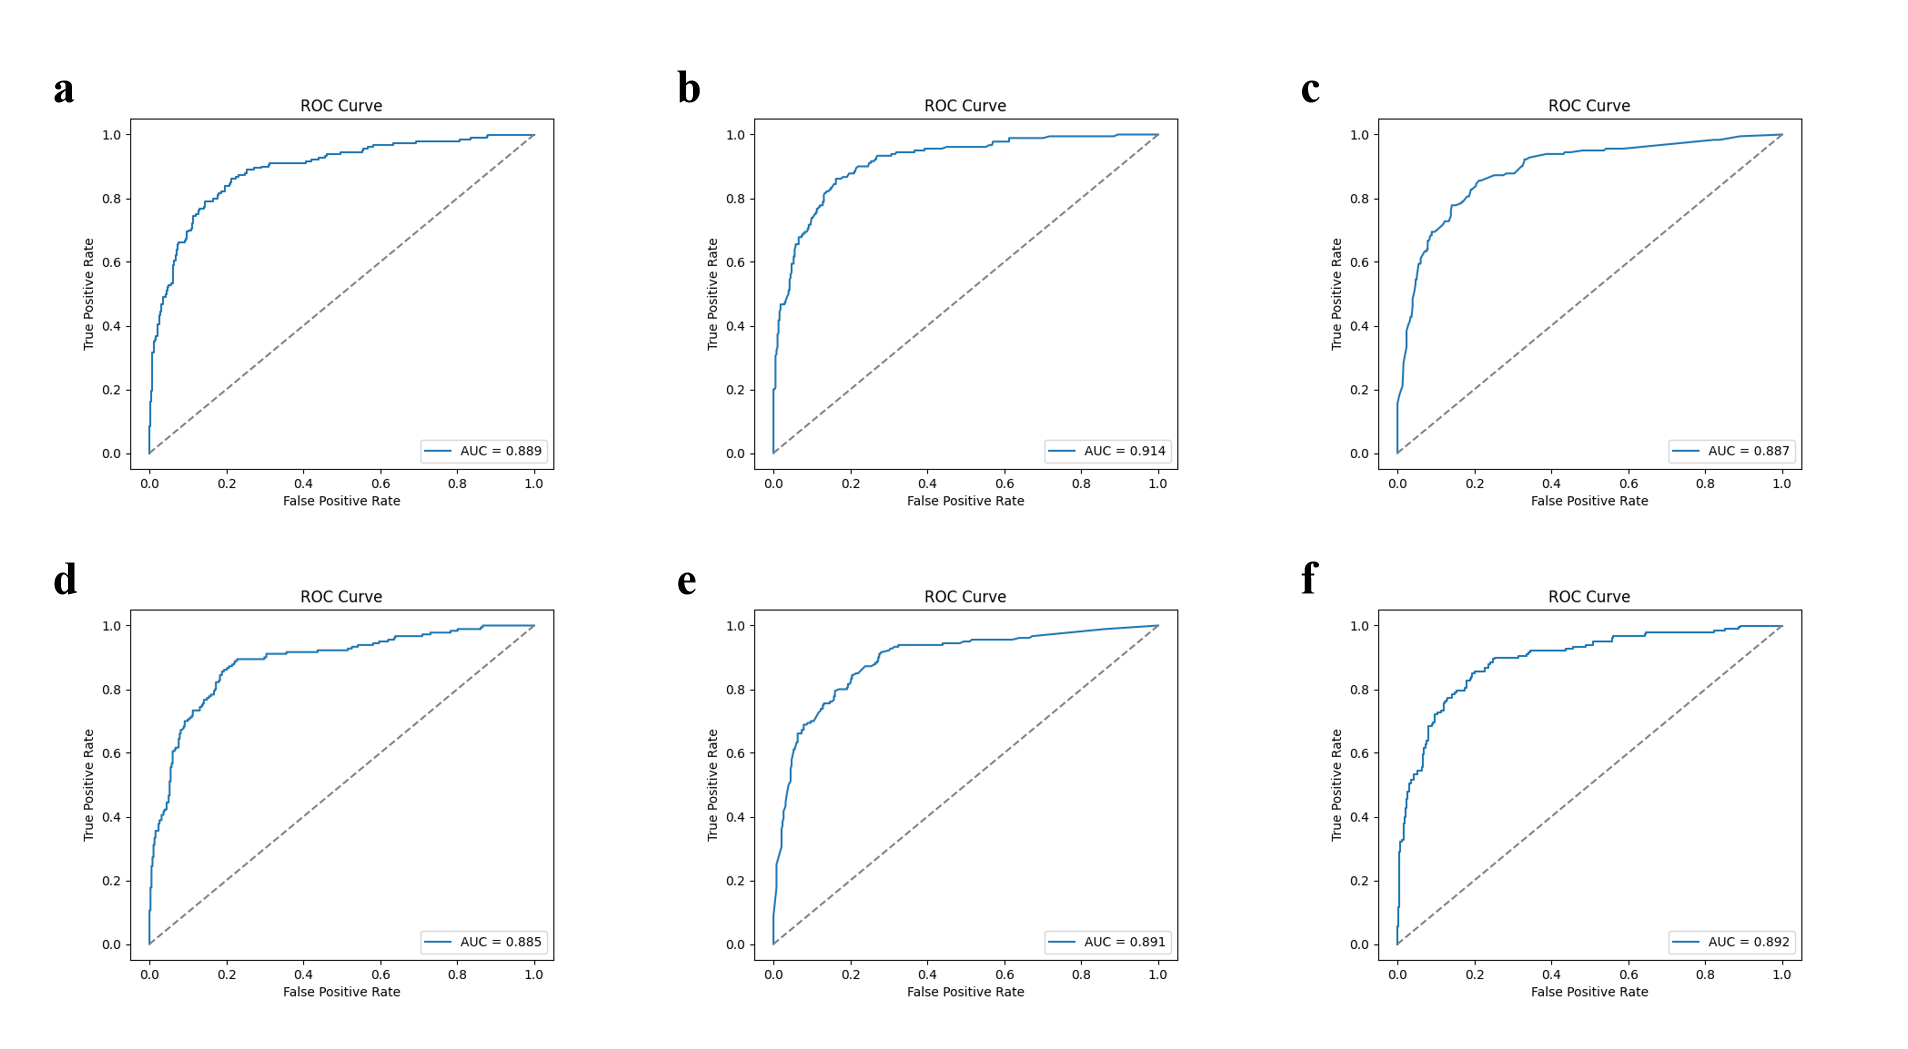


Supplementary Figure S3. Calibration curves of each model in the training set. (a) Logit; (b) LightGBM; (c) Random Forest; (d) SVM; (e) XGBoost; (f) ANN


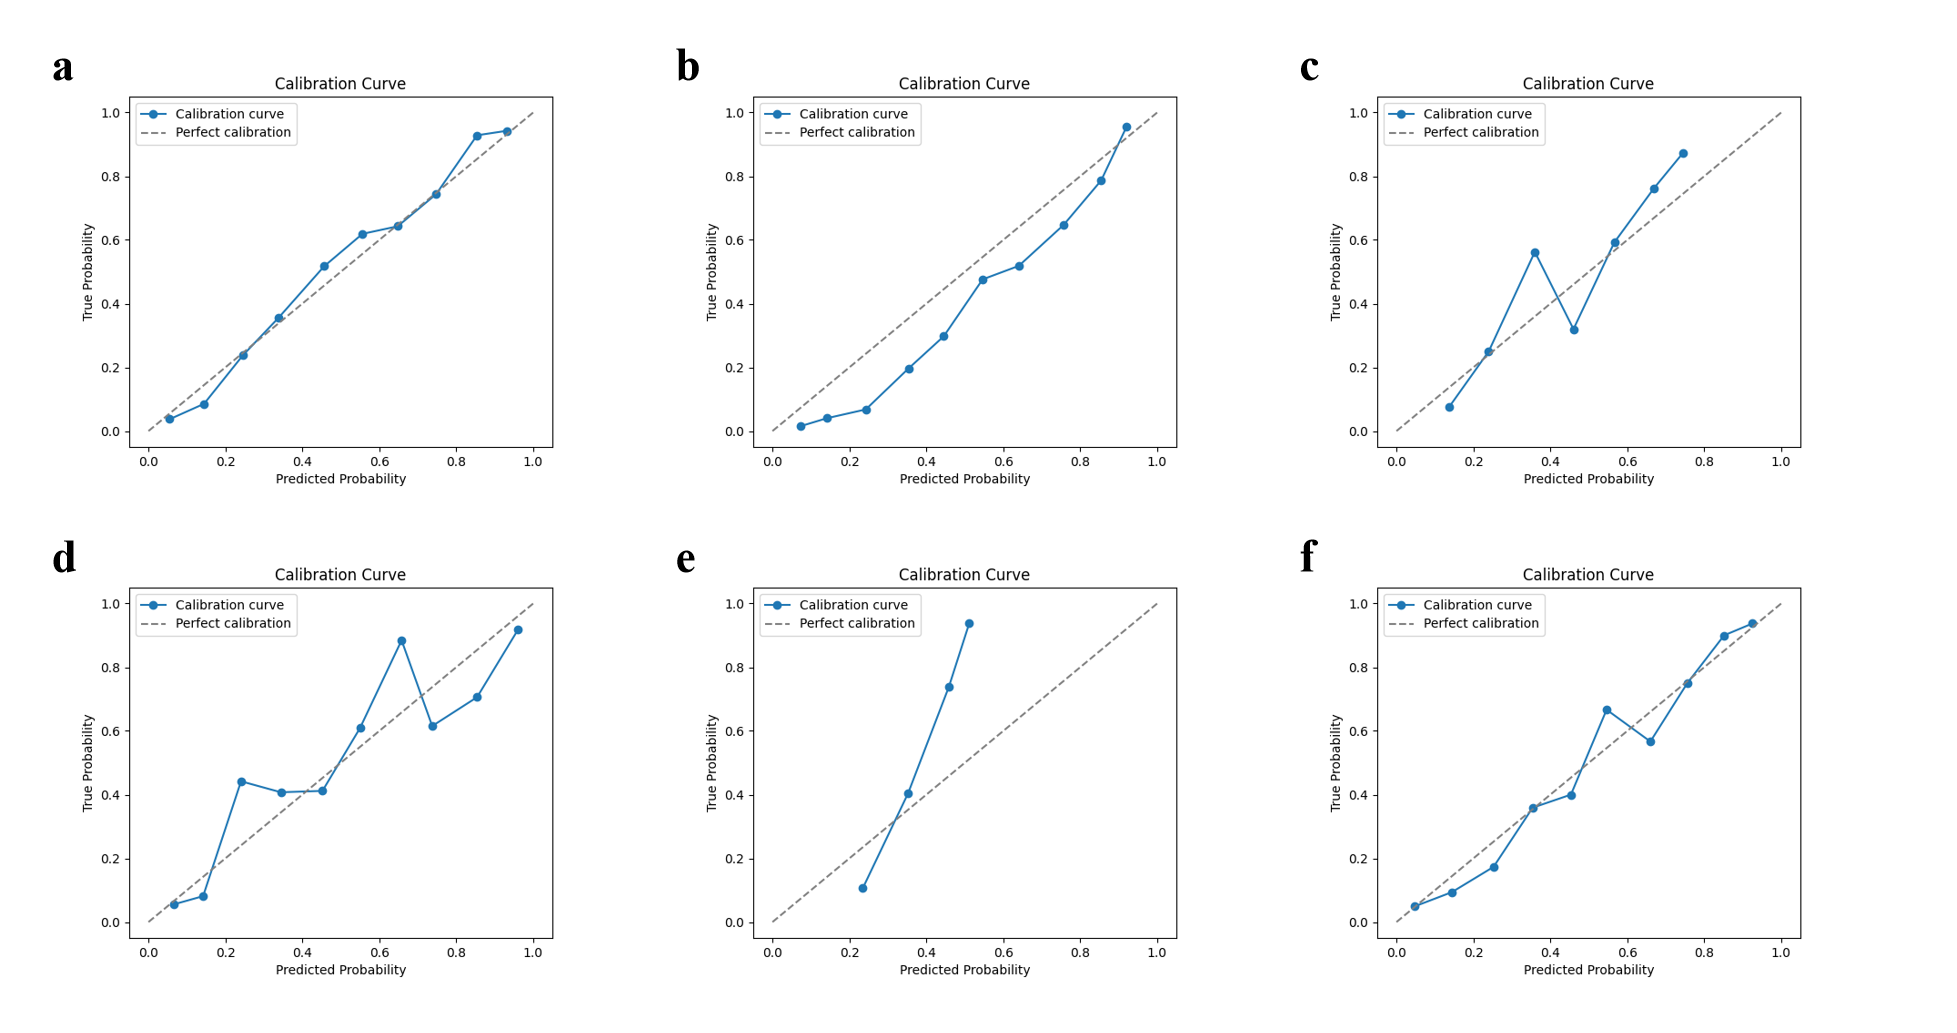


Supplementary Figure S4. DCA curves of each model in the training set. (a) Logit; (b) LightGBM; (c) Random Forest; (d) SVM; (e) XGBoost; (f) ANN


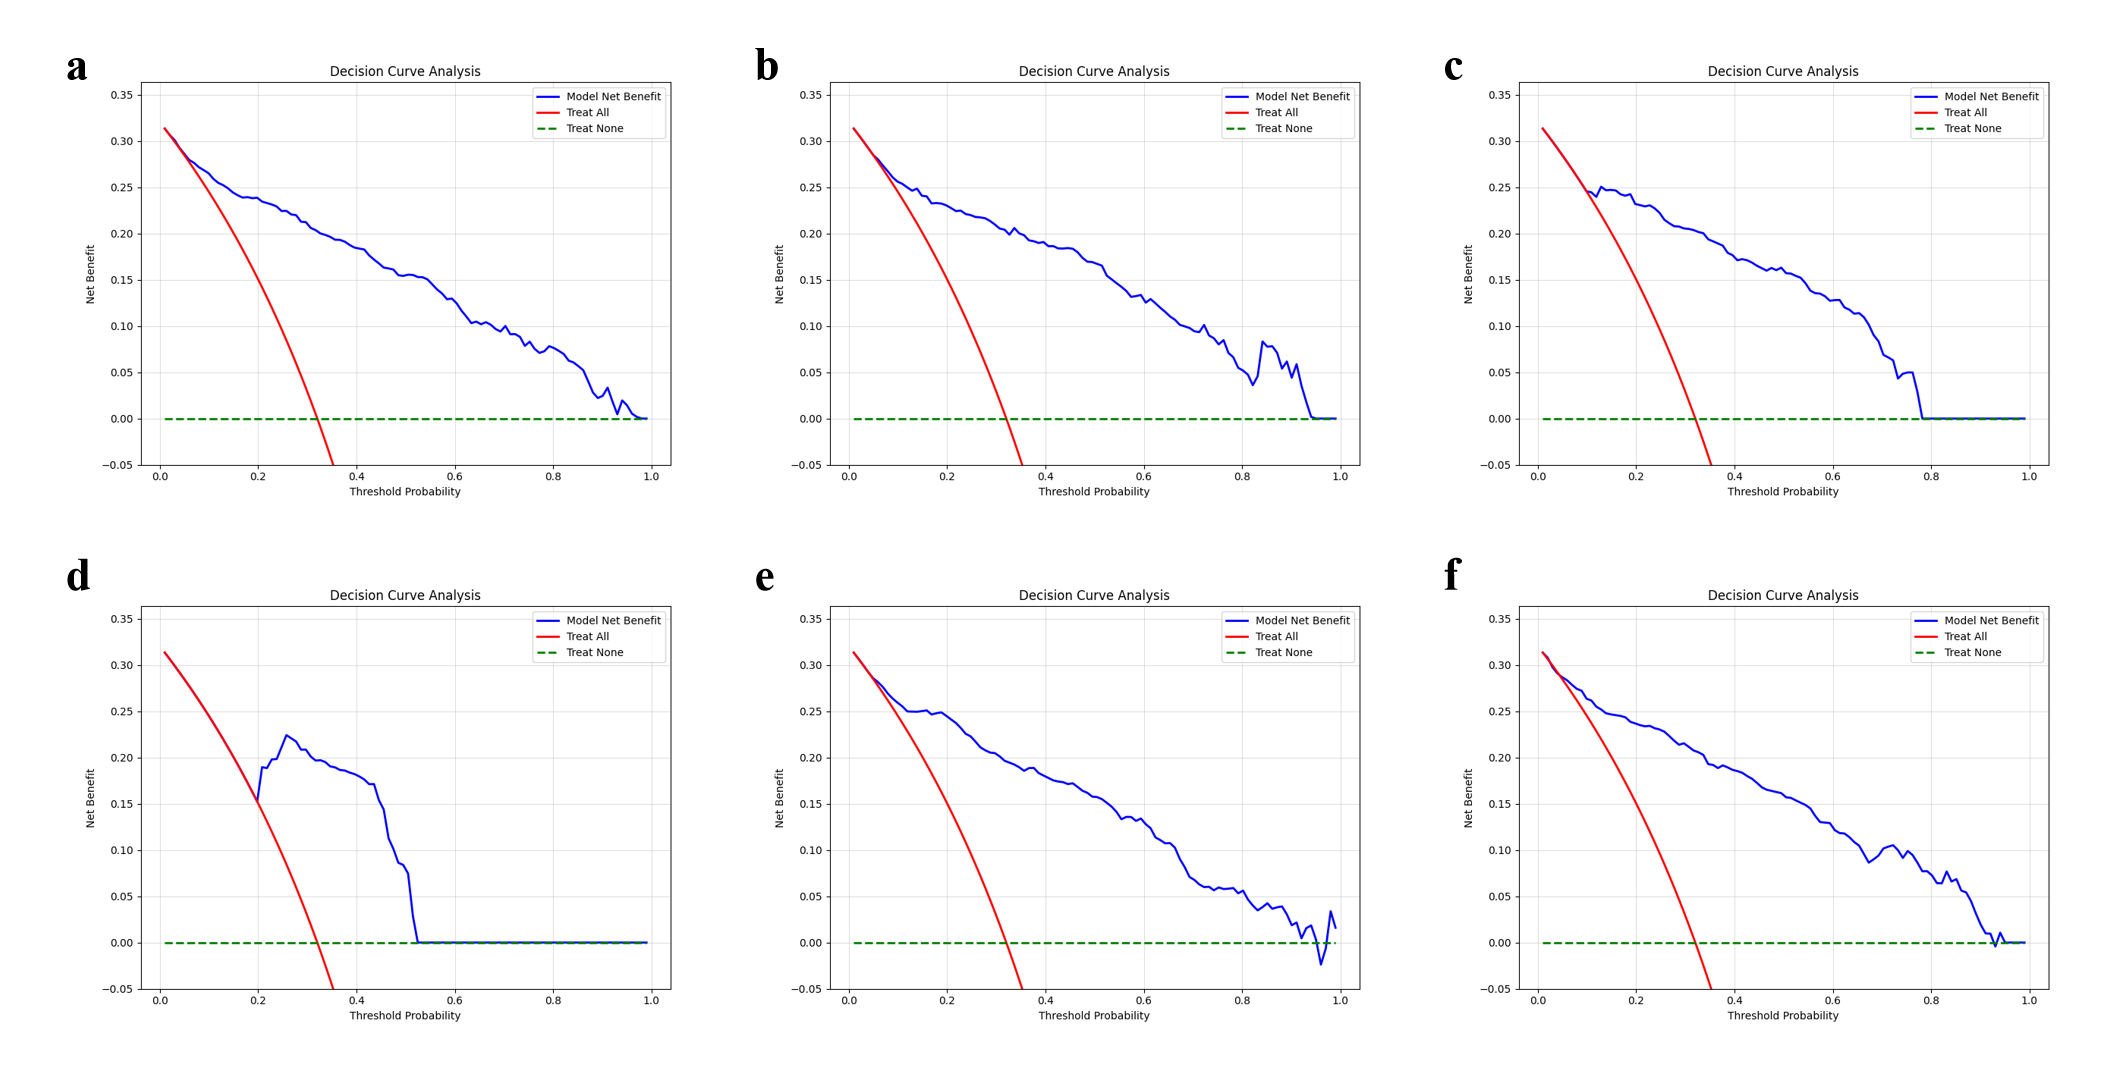


Supplementary Table S1. Baseline characteristics of the development and external validation cohorts.

| Variable | Level | Development | External | p |
| --- | --- | --- | --- | --- |
| n |  | 802 | 255 |  |
| Mitotic count (%) | ≤5/50 HPFs | 548 (68.3) | 191 (74.9) | 0.055 |
|  | >5/50 HPFs | 254 (31.7) | 64 (25.1) |  |
| Sex (%) | Male | 367 (45.8) | 127 (49.8) | 0.291 |
|  | Female | 435 (54.2) | 128 (50.2) |  |
| Tumor size (%) | ≤2 cm | 195 (24.3) | 51 (20.0) | 0.55 |
|  | 2–5 cm | 350 (43.6) | 120 (47.1) |  |
|  | 5–10 cm | 164 (20.4) | 54 (21.2) |  |
|  | >10 cm | 93 (11.6) | 30 (11.8) |  |
| Tumor location (%) | Gastric | 521 (65.0) | 213 (83.5) | <0.001 |
|  | Non-gastric | 281 (35.0) | 42 (16.5) |  |
| Boundary (%) | Well-defined | 549 (68.5) | 141 (55.3) | <0.001 |
|  | Ill-defined | 253 (31.5) | 114 (44.7) |  |
| Ulceration (%) | No | 548 (68.3) | 219 (85.9) | <0.001 |
|  | Yes | 254 (31.7) | 36 (14.1) |  |
| Calcification (%) | No | 554 (69.1) | 209 (82.0) | <0.001 |
|  | Yes | 248 (30.9) | 46 (18.0) |  |
| Liquefaction/Necrosis (%) | No | 528 (65.8) | 183 (71.8) | 0.093 |
|  | Yes | 274 (34.2) | 72 (28.2) |  |
| Morphology (%) | Regular | 566 (70.6) | 123 (48.2) | <0.001 |
|  | Irregular | 236 (29.4) | 132 (51.8) |  |
| Growth pattern (%) | Intraluminal | 465 (58.0) | 144 (56.5) | <0.001 |
|  | Extraluminal | 188 (23.4) | 88 (34.5) |  |
|  | Mixed | 149 (18.6) | 23 (9.0) |  |
| Enhancement pattern (%) | Homogeneous | 476 (59.4) | 153 (60.0) | 0.912 |
|  | Heterogeneous | 326 (40.6) | 102 (40.0) |  |
| Enhancement degree (%) | Mild | 274 (34.2) | 92 (36.1) | <0.001 |
|  | Moderate | 264 (32.9) | 135 (52.9) |  |
|  | Marked | 264 (32.9) | 28 (11.0) |  |
| Coarse vessel sign (%) | No | 559 (69.7) | 183 (71.8) | 0.583 |
|  | Yes | 243 (30.3) | 72 (28.2) |  |
| Peritumoral fat stranding (%) | Clear | 564 (70.3) | 199 (78.0) | 0.021 |
|  | Blurred | 238 (29.7) | 56 (22.0) |  |
| Age (mean [SD]) |  | 62.14 (10.94) | 62.53 (11.41) | 0.629 |
| MLR (mean [SD]) |  | 0.35 (0.35) | 0.25 (0.13) | <0.001 |
| PLR (mean [SD]) |  | 189.60 (112.38) | 143.31 (75.47) | <0.001 |
| SII (mean [SD]) |  | 812.46 (986.84) | 536.91 (511.66) | <0.001 |
| AFR (mean [SD]) |  | 12.45 (4.24) | 15.04 (4.40) | <0.001 |
| PNI (mean [SD]) |  | 11.81 (3.42) | 13.34 (3.11) | <0.001 |
| ALI (mean [SD]) |  | 19.29 (12.80) | 24.68 (11.91) | <0.001 |

Supplementary Table S2. Performance Comparison of Individual Machine Learning Models in the Training Set

| Model | Dataset | Accuracy | Sensitivity | Specificity | PPV | NPV | F1 | Kappa | AUC |
| --- | --- | --- | --- | --- | --- | --- | --- | --- | --- |
| Logistic | Train | 0.835 | 0.661 | 0.916 | 0.788 | 0.852 | 0.719 | 0.603 | 0.889 |
| LightGBM | Train | 0.847 | 0.822 | 0.859 | 0.733 | 0.911 | 0.775 | 0.660 | 0.914 |
| RandomForest | Train | 0.838 | 0.683 | 0.911 | 0.783 | 0.859 | 0.730 | 0.615 | 0.887 |
| SVM | Train | 0.836 | 0.678 | 0.911 | 0.782 | 0.857 | 0.726 | 0.610 | 0.885 |
| XGBoost | Train | 0.754 | 0.250 | 0.992 | 0.938 | 0.737 | 0.395 | 0.300 | 0.891 |
| ANN | Train | 0.843 | 0.717 | 0.903 | 0.777 | 0.871 | 0.746 | 0.633 | 0.892 |

Supplementary Table S3. Performance Evaluation Metrics of the Stacking Ensemble Model in the Training Set

| Model_ID | Model_Composition | Dataset | Accuracy | Sensitivity | Specificity | PPV | NPV | F1 | Kappa | AUC |
| --- | --- | --- | --- | --- | --- | --- | --- | --- | --- | --- |
| Model_1 | RF+XGB+LGBM+SVM+ANN | Train | 0.831 | 0.683 | 0.901 | 0.764 | 0.858 | 0.721 | 0.601 | 0.879 |
| Model_2 | RF+XGB+LGBM+SVM | Train | 0.831 | 0.689 | 0.898 | 0.761 | 0.860 | 0.723 | 0.602 | 0.876 |
| Model_3 | RF+LGBM+SVM+ANN | Train | 0.833 | 0.689 | 0.901 | 0.765 | 0.860 | 0.725 | 0.605 | 0.878 |
| Model_4 | RF+XGB+SVM+ANN | Train | 0.831 | 0.672 | 0.906 | 0.771 | 0.854 | 0.718 | 0.598 | 0.878 |
| Model_5 | XGB+LGBM+SVM+ANN | Train | 0.831 | 0.678 | 0.903 | 0.767 | 0.856 | 0.720 | 0.599 | 0.877 |
| Model_6 | RF+XGB+LGBM+ANN | Train | 0.833 | 0.689 | 0.901 | 0.765 | 0.860 | 0.725 | 0.605 | 0.879 |
| Model_7 | RF+SVM+ANN | Train | 0.833 | 0.678 | 0.906 | 0.772 | 0.856 | 0.722 | 0.603 | 0.875 |
| Model_8 | LGBM+SVM+ANN | Train | 0.835 | 0.683 | 0.906 | 0.774 | 0.859 | 0.726 | 0.608 | 0.876 |
| Model_9 | LGBM+RF+ANN | Train | 0.833 | 0.694 | 0.898 | 0.762 | 0.862 | 0.727 | 0.607 | 0.879 |
| Model_10 | LGBM+RF+SVM | Train | 0.829 | 0.689 | 0.895 | 0.756 | 0.859 | 0.721 | 0.598 | 0.873 |
| Model_11 | XGB+SVM+ANN | Train | 0.826 | 0.656 | 0.906 | 0.766 | 0.848 | 0.707 | 0.584 | 0.875 |
| Model_12 | XGB+RF+ANN | Train | 0.831 | 0.672 | 0.906 | 0.771 | 0.854 | 0.718 | 0.598 | 0.878 |
| Model_13 | XGB+RF+SVM | Train | 0.833 | 0.678 | 0.906 | 0.772 | 0.856 | 0.722 | 0.603 | 0.874 |
| Model_14 | XGB+LGBM+ANN | Train | 0.829 | 0.678 | 0.901 | 0.763 | 0.856 | 0.718 | 0.596 | 0.877 |
| Model_15 | XGB+LGBM+SVM | Train | 0.829 | 0.678 | 0.901 | 0.763 | 0.856 | 0.718 | 0.596 | 0.874 |
| Model_16 | XGB+LGBM+RF | Train | 0.835 | 0.694 | 0.901 | 0.767 | 0.862 | 0.729 | 0.610 | 0.875 |
| Model_17 | SVM+ANN | Train | 0.826 | 0.683 | 0.893 | 0.750 | 0.857 | 0.715 | 0.590 | 0.869 |
| Model_18 | RF+ANN | Train | 0.833 | 0.672 | 0.908 | 0.776 | 0.855 | 0.720 | 0.602 | 0.875 |
| Model_19 | RF+SVM | Train | 0.824 | 0.678 | 0.893 | 0.749 | 0.855 | 0.711 | 0.585 | 0.857 |
| Model_20 | LGBM+ANN | Train | 0.831 | 0.667 | 0.908 | 0.774 | 0.853 | 0.716 | 0.597 | 0.873 |
| Model_21 | LGBM+SVM | Train | 0.819 | 0.656 | 0.895 | 0.747 | 0.847 | 0.698 | 0.569 | 0.856 |
| Model_22 | LGBM+RF | Train | 0.831 | 0.683 | 0.901 | 0.764 | 0.858 | 0.721 | 0.601 | 0.863 |
| Model_23 | XGB+ANN | Train | 0.831 | 0.667 | 0.908 | 0.774 | 0.853 | 0.716 | 0.597 | 0.876 |
| Model_24 | XGB+SVM | Train | 0.829 | 0.661 | 0.908 | 0.773 | 0.851 | 0.713 | 0.592 | 0.872 |
| Model_25 | XGB+RF | Train | 0.836 | 0.683 | 0.908 | 0.779 | 0.859 | 0.728 | 0.612 | 0.874 |
| Model_26 | XGB+LGBM | Train | 0.829 | 0.672 | 0.903 | 0.766 | 0.854 | 0.716 | 0.595 | 0.870 |
| Model_27 | ANN | Train | 0.824 | 0.656 | 0.903 | 0.761 | 0.848 | 0.705 | 0.580 | 0.868 |
| Model_28 | SVM | Train | 0.779 | 0.439 | 0.940 | 0.775 | 0.780 | 0.560 | 0.428 | 0.716 |
| Model_29 | RandomForest | Train | 0.822 | 0.728 | 0.867 | 0.720 | 0.871 | 0.724 | 0.593 | 0.772 |
| Model_30 | LightGBM | Train | 0.822 | 0.661 | 0.898 | 0.753 | 0.849 | 0.704 | 0.578 | 0.859 |
| Model_31 | XGBoost | Train | 0.826 | 0.656 | 0.906 | 0.766 | 0.848 | 0.707 | 0.584 | 0.873 |

Supplementary Figure S5. Internal validation and evaluation of the Stacking ensemble model. (a) Receiver Operating Characteristic (ROC) curve; (b) Calibration curve; (c) Decision curve.


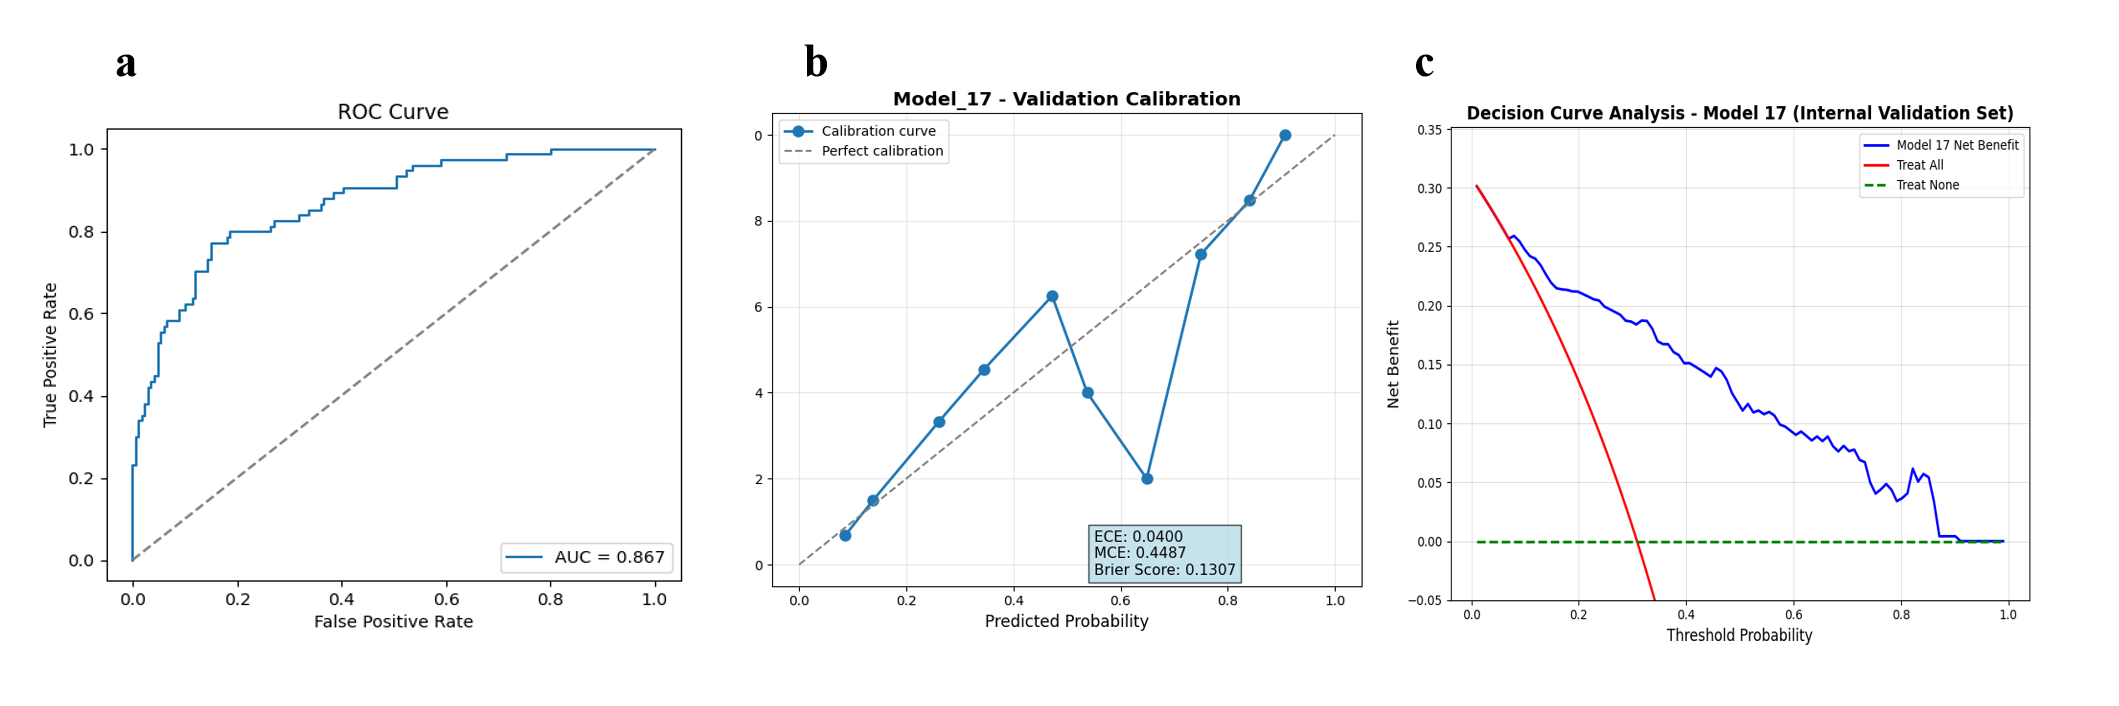


Supplementary Figure S6. Waterfall plot of external validation for the Stacking ensemble model.


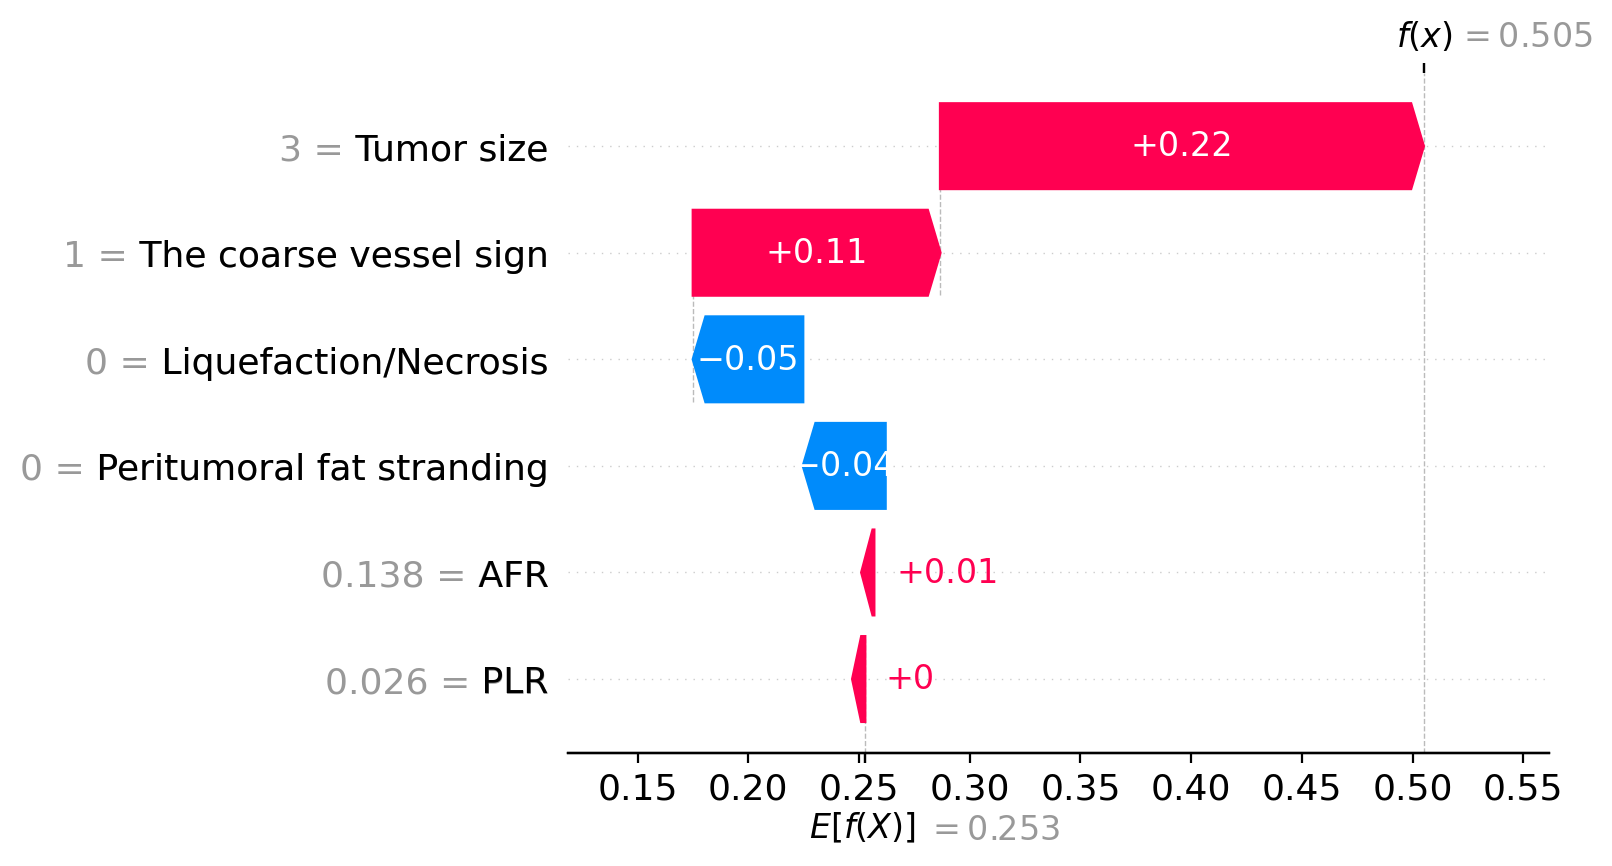


Force plots start from the baseline risk and use red (positive, increasing risk) and blue (negative, decreasing risk) bands to show each feature’s SHAP value, with band length indicating effect magnitude and the net effect pointing to the final predicted probability. Waterfall plots stack a case’s features by absolute contribution, clearly showing the cumulative shift from baseline to prediction.

In high‑risk cases, larger tumor size (especially >10 cm), presence of coarse vessel sign, liquefaction/necrosis, blurred perilesional fat plane, increased PLR and decreased AFR jointly push the predicted probability upward (red bands). In low‑risk cases, smaller tumors (≤2 cm), absence of coarse vessel sign, clear perilesional fat plane, lower PLR and higher AFR pull the probability downward (blue bands). These local patterns align with the global rankings in Figures 8 and 9, indicating these six features are primary determinants of high mitotic count, with AFR generally acting as a protective factor.

Supplementary Figure S7. Force plot of external validation for the Stacking ensemble model.


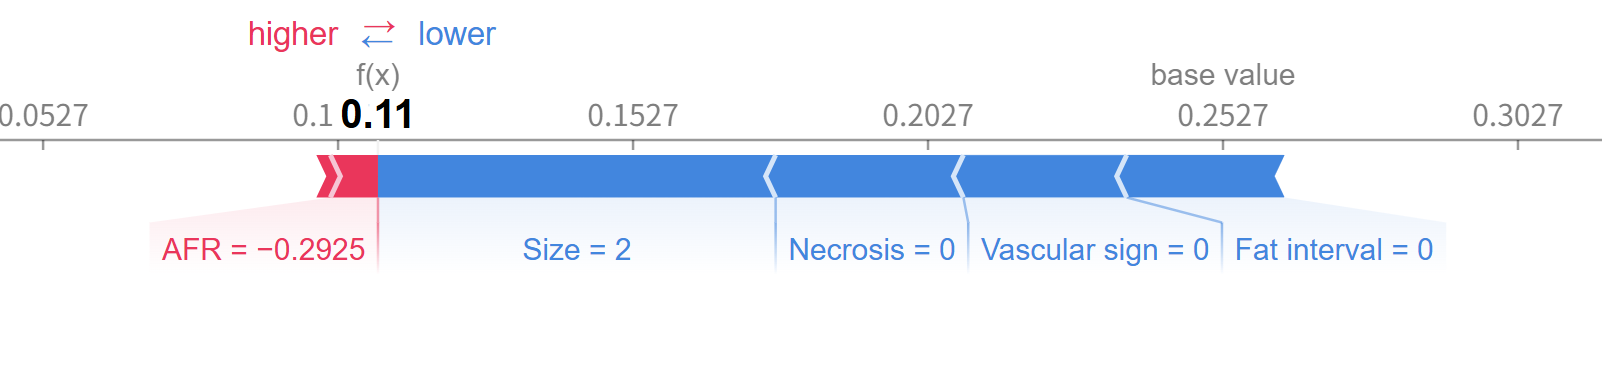

Supplement: Supplementary file 1 [file 593404%20Revised%20Supplementary%20Material.doc]
